# Supplementary material for: Simultaneous Amperometric Aptasensor Based on Diazonium Grafted Screen-Printed Carbon Electrode for Detection of CFP10 and MPT64 Biomarkers for Early Tuberculosis Diagnosis
Source: MDPI journal article supplement (doi:10.3390/bios12110996), 2022-11-09
Supplement: s1 [file s1]

Supplementary

# Simultaneous Amperometric Aptasensor Based on Diazonium Grafted Screen-Printed Carbon Electrode for Detection of CFP10 and MPT64 Biomarkers for Early Tuberculosis Diagnosis

Muhammad Hafiznur Yunus, Nor Azah Yusof, Jaafar Abdullah, Yusran Sulaiman, Nurul Hanun Ahmad Raston and Siti Suraiya Md Noor

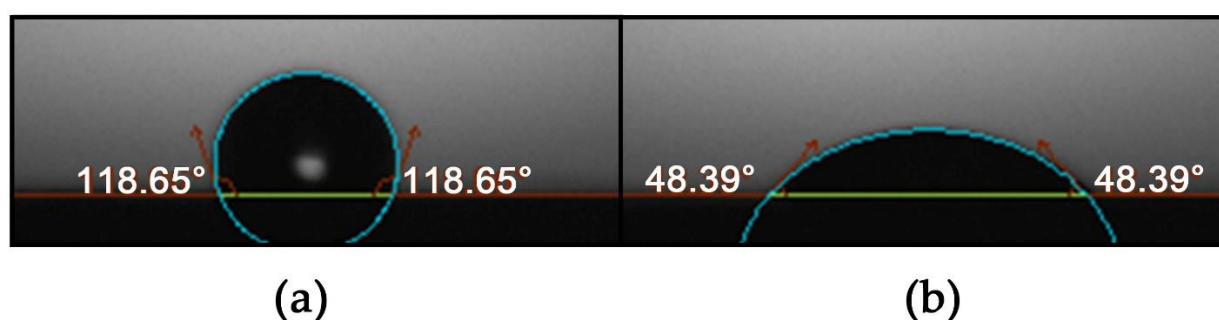

**Figure S1.** Contact angle analysis of (a) bare carbon electrode and (b) diazonium grafted surface.

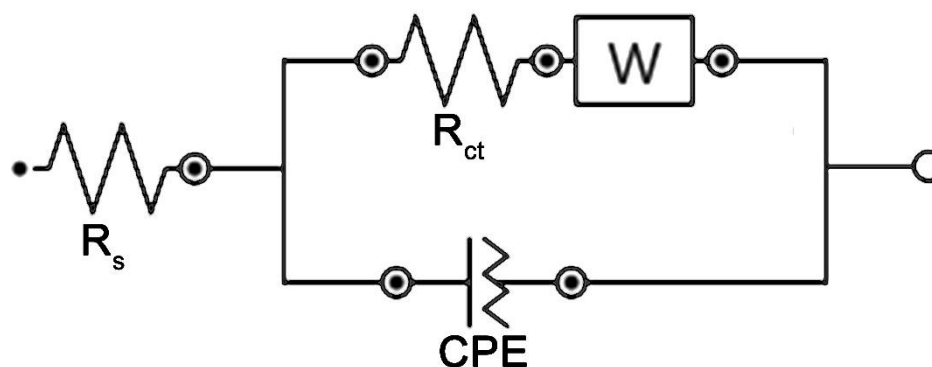

**Figure S2.** Suggested equivalent circuit model of the Nyquist plot from EIS measurements.  $R_s$ : solution resistance;  $R_{ct}$ : charge-transfer resistance;  $W$ : Warburg impedance;  $CPE$ : constant phase element.

**Table S1.** Fitting parameters for Nyquist plot for stepwise modification of the developed sensor.

| Surface   | EIS parameters                       | Fitted value         | Fitted error (%) |
|-----------|--------------------------------------|----------------------|------------------|
| Bare SPCE | Solution resistance, $R_s$           | 156.36 $\Omega$      | 0.657            |
|           | Charge transfer resistance, $R_{ct}$ | 1568.10 $\Omega$     | 0.58             |
|           | Constant phase element, $CPE$        | 0.92 $\mu\text{Mho}$ | 4.035            |
|           | Warburg impedance, $W$               | 0.0013 $\text{Mho}$  | 1.317            |
| SPCE-ABA  | Solution resistance, $R_s$           | 164.72 $\Omega$      | 0.36             |
|           | Charge transfer resistance, $R_{ct}$ | 49371 $\Omega$       | 0.395            |
|           | Constant phase element, $CPE$        | 1.19 $\mu\text{Mho}$ | 0.844            |
|           | Warburg impedance, $W$               | 0.0010 $\text{Mho}$  | 11.418           |

|                                           |                                      |                       |       |
|-------------------------------------------|--------------------------------------|-----------------------|-------|
| SPCE-ABA-EDC/NHS                          | Solution resistance, $R_s$           | 244 $\Omega$          | 1.506 |
|                                           | Charge transfer resistance, $R_{ct}$ | 1562.20 $\Omega$      | 1.122 |
|                                           | Constant phase element, CPE          | 23.56 $\mu\text{Mho}$ | 3.391 |
|                                           | Warburg impedance, $W$               | 0.0013 Mho            | 1.448 |
| SPCE-ABA-EDC/NHS-Aptamer                  | Solution resistance, $R_s$           | 154.68 $\Omega$       | 0.427 |
|                                           | Charge transfer resistance, $R_{ct}$ | 10010 $\Omega$        | 0.486 |
|                                           | Constant phase element, CPE          | 1.75 $\mu\text{Mho}$  | 0.225 |
|                                           | Warburg impedance, $W$               | 0.0015 Mho            | 5.507 |
| SPCE-ABA-EDC/NHS-Aptamer-Ethanolamine     | Solution resistance, $R_s$           | 158.97 $\Omega$       | 0.512 |
|                                           | Charge transfer resistance, $R_{ct}$ | 2224.50 $\Omega$      | 0.548 |
|                                           | Constant phase element, CPE          | 3.31 $\mu\text{Mho}$  | 2.691 |
|                                           | Warburg impedance, $W$               | 0.0014 Mho            | 1.473 |
| SPCE-ABA-EDC/NHS-Aptamer-Ethanolamine-BSA | Solution resistance, $R_s$           | 133.9 $\Omega$        | 1.799 |
|                                           | Charge transfer resistance, $R_{ct}$ | 3076.1 $\Omega$       | 2.342 |
|                                           | Constant phase element, CPE          | 19.44 $\mu\text{Mho}$ | 6.565 |
|                                           | Warburg impedance, $W$               | 0.0014 Mho            | 6.291 |
